# Supplementary material for: Hydrodynamic interactions in squirmer dumbbells: active stress-induced alignment and locomotion
Source: Royal Society of Chemistry journal article supplement (doi:10.1039/d0sm01569e), 2020-01-01
Supplement: d0sm01569e5.pdf [file d0sm01569e5.pdf]

## Supporting Information

### Hydrodynamic interactions in squirmer dumbbells: active stress-induced alignment and locomotion

Judit Clopés, Gerhard Gompper, and Roland G. Winkler

*Theoretical Physics of Living Matter, Institute of Biological Information Processing and Institute for Advanced Simulation, Forschungszentrum Jülich and JARA, 52425 Jülich, Germany*

#### S-I. MULTIPARTICLE COLLISION DYNAMICS

In MPC, the fluid is represented by  $N$  point particles of mass  $m$  undergoing subsequent streaming and collision steps [1–4]. In the absence of any external force, the particles move ballistically in the streaming step, and their positions  $\mathbf{r}_i(t)$  ( $i \in \{1, \dots, N\}$ ) are updated according to

$$\mathbf{r}_i(t+h) = \mathbf{r}_i(t) + h\mathbf{v}_i(t), \quad (\text{S-1})$$

where  $\mathbf{v}_i$  is the velocity and  $h$  the time interval between collisions, which is denoted as collision time. In the collision step, the particles interact in a stochastic, but momentum conserving manner. For this purpose, the available volume is divided into cubic cells of side length  $a$ , which defines the collision environment. In the Stochastic Rotation Dynamics (SRD) version of MPC (MPC-SRD) [3], the relative velocities, with respect to the center-of-mass velocity of each cell, of the fluid particles are rotated around a randomly oriented axis by a fixed angle  $\alpha$ . The orientation of the rotation axis is chosen randomly for every collision cell and time step. Applying the angular momentum conserving rotation (MPC-SRD+a) [5–7], the velocities after rotation are given by

$$\mathbf{v}_i(t+h) = \mathbf{v}_{cm}(t) + \mathbf{R}(\alpha)\mathbf{v}_{i,c} + \boldsymbol{\omega}(t) \times \mathbf{r}_{i,c}(t). \quad (\text{S-2})$$

Here, the center-of-mass position and velocity are

$$\mathbf{r}_{cm} = \frac{1}{N_c} \sum_{i=1}^{N_c} \mathbf{r}_i, \quad \mathbf{v}_{cm} = \frac{1}{N_c} \sum_{i=1}^{N_c} \mathbf{v}_i, \quad (\text{S-3})$$

and the angular velocity is

$$\boldsymbol{\omega} = m\mathbf{I}^{-1} \sum_{j=1}^{N_c} \{\mathbf{r}_{j,c} \times (\mathbf{v}_{j,c} - \mathbf{R}(\alpha)\mathbf{v}_{j,c})\}. \quad (\text{S-4})$$

$\mathbf{R}$  is the rotation matrix [3, 4],  $\mathbf{I}$  denotes the moment-of-inertia tensor of the respective particles in the collision cell with respect to their center-of-mass, and  $\mathbf{r}_{i,c} = \mathbf{r}_i - \mathbf{r}_{cm}$ ,  $\mathbf{v}_{i,c} = \mathbf{v}_i - \mathbf{v}_{cm}$ . Since this rotation violates energy conservation, we apply the Maxwell-Boltzmann scaling approach, which yields a Maxwellian distribution of kinetic energy.

Discretization in collision cells implies violation of Galilean invariance. To restore Galilean invariance, a random shift of the entire computational grid is applied [8, 9].

#### S-II. RIGID BODY DYNAMICS OF SPHEROIDS

This section describes a general procedure for the solution of the rigid body equations of motion of spheroidal colloids with spheres as a special case.

During the MPC streaming step, a spheroid moves according to rigid-body dynamics, i.e., translational motion for the center of mass position,  $\mathbf{C}$ , and rotation, which is described by a quaternion,  $\mathbf{q} = (q_0, q_1, q_2, q_3)^T$  [13], as described in Ref. [14]. Explicitly, the equations of motion are given by

$$M\ddot{\mathbf{C}} = \mathbf{F}, \quad (\text{S-5})$$

$$\ddot{\mathbf{q}} = \frac{1}{2} \left[ \mathbf{Q}(\dot{\mathbf{q}}) \begin{pmatrix} 0 \\ \boldsymbol{\Omega}^b \end{pmatrix} + \mathbf{Q}(\mathbf{q}) \begin{pmatrix} 0 \\ \boldsymbol{\Omega}^b \end{pmatrix} \right], \quad (\text{S-6})$$

$$\dot{\mathbf{q}} = \frac{1}{2} \mathbf{Q}(\mathbf{q}) \begin{pmatrix} 0 \\ \boldsymbol{\Omega}^b \end{pmatrix}, \quad (\text{S-7})$$

$$\frac{d\Omega_\alpha^b}{dt} = I_\alpha^{-1} [T_\alpha^b + (I_\beta - I_\gamma)\Omega_\beta^b\Omega_\gamma^b]. \quad (\text{S-8})$$

Here,  $\mathbf{Q}(\mathbf{q})$  is

$$\mathbf{Q}(\mathbf{q}) = \begin{pmatrix} q_0 & -q_1 & -q_2 & -q_3 \\ q_1 & q_0 & -q_3 & q_2 \\ q_2 & q_3 & q_0 & -q_1 \\ q_3 & -q_2 & q_1 & q_0 \end{pmatrix} \quad (\text{S-9})$$

and  $\mathbf{F}$  and  $\mathbf{T}$  are the force and torque acting on the spheroid. Forces and torques are derived from steric interactions with another squirmers. Equations (S-8) are Euler's equations for rigid body dynamics and hold for  $(\alpha, \beta, \gamma) = (x, y, z)$ ,  $(y, z, x)$ , and  $(z, x, y)$ . The superscript b refers to the body fixed reference frame. Body-fixed and laboratory-frame quantities can be related via

$$\mathbf{a}^b = \mathbf{D}\mathbf{a}^s, \quad (\text{S-10})$$

where  $\mathbf{a}^b$  is a vector in the body-fixed reference frame and  $\mathbf{a}^s$  a vector in the laboratory frame (space fixed). The rotation matrix,  $\mathbf{D}$ , is related to the quaternion  $\mathbf{q}$  by

$$\mathbf{D} = \begin{pmatrix} q_0^2 + q_1^2 - q_2^2 - q_3^2 & 2(q_1q_2 + q_0q_3) & 2(q_1q_3 - q_0q_2) \\ 2(q_2q_1 - q_0q_3) & q_0^2 - q_1^2 + q_2^2 - q_3^2 & 2(q_2q_3 + q_0q_1) \\ 2(q_2q_1 + q_0q_2) & 2(q_3q_2 - q_0q_1) & q_0^2 - q_1^2 - q_2^2 + q_3^2 \end{pmatrix}.$$

The orientation vector of a spheroid is  $\mathbf{e}^s = \mathbf{D}^T \mathbf{e}^b = \mathbf{D}^T(0, 0, 1)^T$ . The moment of inertia tensor in the body-fixed frame  $\mathbf{I}^b$  is a constant diagonal matrix with diagonal

elements  $I_x = (M/5)(b_x^2 + b_z^2) = I_y$  and  $I_z = (2M/5)b_x^2$ . When needed, the angular velocity is calculated as  $\boldsymbol{\Omega}^s = \mathbf{D}^T (\mathbf{I}^b)^{-1} \mathbf{D} \mathbf{L}^s$ , where  $\mathbf{L}^s$  is the angular momentum. For vectors in the laboratory frame, we will frequently omit the superscript.

For the numerical integration of the equations of motion, the Verlet algorithm for rigid-body rotational motion is applied, as proposed in Ref. [13]. Integration for a time step  $\tau$  is performed as follows:

- Update  $\mathbf{C}$  and  $\mathbf{q}$  according to

$$\mathbf{C}(t + \tau) = \mathbf{C}(t) + \mathbf{U}(t)\tau + \frac{\tau^2}{2M} \mathbf{F}^s(t), \quad (\text{S-11})$$

$$\mathbf{q}(t + \tau) = (1 - \tilde{\lambda})\mathbf{q}(t) + \dot{\mathbf{q}}\tau + \frac{\tau^2}{2} \ddot{\mathbf{q}}, \quad (\text{S-12})$$

$$\begin{aligned} \tilde{\lambda} &= 1 - \dot{\mathbf{q}}^2 \tau^2 / 2 \\ &- \sqrt{1 - \dot{\mathbf{q}}^2 \tau^2 - \dot{\mathbf{q}} \cdot \ddot{\mathbf{q}} \tau^3 - (\ddot{\mathbf{q}}^2 - \dot{\mathbf{q}}^4) \tau^4 / 4}. \end{aligned} \quad (\text{S-13})$$

The parameter  $\tilde{\lambda}$  is introduced to ensure  $\mathbf{q}^2 = 1$ .

- Calculate forces and torques  $\mathbf{F}^s(t + \tau)$  and  $\mathbf{T}^s(t + \tau)$ .
- Update  $\mathbf{U}$  and  $\mathbf{L}^s$  according to

$$\mathbf{U}(t + \tau) = \mathbf{U}(t) + \frac{\tau}{2M} [\mathbf{F}^s(t) + \mathbf{F}^s(t + \tau)], \quad (\text{S-14})$$

$$\mathbf{L}^s(t + \tau) = \mathbf{L}^s(t) + \frac{\tau}{2} [\mathbf{T}^s(t) + \mathbf{T}^s(t + \tau)]. \quad (\text{S-15})$$

### S-III. IMPLEMENTATION OF A SPHEROIDAL SQUIRMER IN MPC

#### A. Streaming step

During the streaming step, a spheroid will collide with several MPC particles. Since the total change in (angular) momentum of a spheroid in a streaming step is small, we perform the collisions with MPC particles in a coarse-grained way [15] (see also Ref. [16]).

At first, we perform a streaming from  $t$  to  $t + h$  without interactions with MPC particles, but taking steric interactions into account as described in Sec. S-II. Subsequently, all MPC particles are streamed, i.e., their positions are updated as described in Sec. S-I, where a certain fraction of MPC particles penetrates a spheroid. Each particle  $i$  inside a spheroid at time  $t + h$  is moved back in time by half a time step and subsequently translated onto the spheroid's surface. The translation can be realized in different ways. One possibility is to construct a virtual spheroid with semi-axes  $\tilde{b}_z, \tilde{b}_x, \tilde{b}_z/\tilde{b}_x = b_z/b_x$  and  $\mathbf{r}_i(t + h/2)$  on its surface. The particle is then translated along the normal vector of the virtual spheroid until it is on the real spheroid's surface. Alternatively, the difference vector  $\mathbf{r}_i(t + h/2) - \mathbf{C}(t + h/2)$  can be scaled such that the particle position lies on the spheroid's surface. A comparison yields no significant difference. For all MPC particle on the spheroid's surface at  $t + h/2$ , the momentum transfer

$$\mathbf{J}_i = 2m \{ \mathbf{v}_i - \mathbf{U} - \boldsymbol{\Omega} \times (\mathbf{r}_i - \mathbf{C}) - \mathbf{D}^T \mathbf{u}_{sq}^b [\mathbf{D}(\mathbf{r}_i - \mathbf{C})] \} \quad (\text{S-16})$$

is determined, taking into account the squirmer surface fluid velocity  $\mathbf{u}_{sq}$  of Eq. (1) [17]. A useful identity to determine the tangent vector  $\mathbf{s}$  on the squirmer surface is given in Eq. (8) of Ref. [18], and the coordinate  $\zeta$  is given by

$$\zeta = \frac{1}{2c} \left( \sqrt{x^2 + y^2 + (z + c)^2} - \sqrt{x^2 + y^2 + (z - c)^2} \right). \quad (\text{S-17})$$

The velocity of the MPC particle is updated according to  $\mathbf{v}'_i = \mathbf{v}_i - \mathbf{J}_i/m$ . Subsequently, the position  $\mathbf{r}_i(t + h)$  is obtained by streaming the MPC particle for the remaining time  $h/2$  with velocity  $\mathbf{v}'_i$ , i.e.,  $\mathbf{r}_i(t + h) = \mathbf{r}_i(t + h/2) + h\mathbf{v}'_i/2$ .

As a consequence of the elastic collisions, the center-of-mass velocity and rotation frequency of a spheroid are finally given by

$$\mathbf{U}(t + h) = \mathbf{U}'(t + h) + \mathbf{J}/M, \quad (\text{S-18})$$

$$\boldsymbol{\Omega}(t + h) = \boldsymbol{\Omega}'(t + h) + \mathbf{D}^T (\mathbf{I}^b)^{-1} \mathbf{D} \mathbf{L}, \quad (\text{S-19})$$

where  $\mathbf{J} = \sum_i \mathbf{J}_i$  is total momentum transfer by the MPC fluid and  $\mathbf{L} = \sum_i (\mathbf{r}_i(t + h/2) - \mathbf{C}(t + h/2)) \times \mathbf{J}_i$  is the respective angular momentum transfer. The prime indicates the velocity and rotation frequency after streaming without MPC interactions.

#### B. Collision step

For the collision step with MPC particles, phantom particles are distributed inside each spheroid for no-slip boundary conditions [8, 15, 16]. Their number density and mass are equal to those of fluid particles. Phantom particle positions  $\mathbf{r}_i^p$  are uniformly distributed inside a spheroid and their velocities are given by

$$\mathbf{v}_i^p = \mathbf{U} + \boldsymbol{\Omega} \times (\mathbf{r}_i - \mathbf{C}) + \mathbf{u}_{sq,i} + \mathbf{v}_i^R. \quad (\text{S-20})$$

The Cartesian components of  $\mathbf{v}_i^R$  are Gaussian-distributed random numbers with zero mean and variance  $\sqrt{k_B T/m}$ . The squirming velocity  $\mathbf{u}_{sq,i}$  is determined by Eq. (1) of the main document, with the phantom particle position projecting onto the spheroid's surface (cf. Sec. S-III A). As a result of MPC collisions, a spheroid's linear and angular momenta change by  $\mathbf{J}_i^p = m(\tilde{\mathbf{v}}_i^p - \mathbf{v}_i^p)$  and  $\mathbf{L}_i^p = (\mathbf{r}_i^p - \mathbf{C}) \times \mathbf{J}_i^p$ , where  $\tilde{\mathbf{v}}_i^p$  and  $\mathbf{v}_i^p$  are the phantom particle's velocity after and before the MPC collision. Hence, the spheroid velocity and angular velocity become

$$\mathbf{U}(t + h) = \mathbf{U}(t + h) + \mathbf{J}^p(t + h)/M, \quad (\text{S-21})$$

$$\boldsymbol{\Omega}(t + h) = \boldsymbol{\Omega}(t + h) + \mathbf{R}^T (\mathbf{I}^b)^{-1} \mathbf{R} \mathbf{L}^p. \quad (\text{S-22})$$

Here,  $\mathbf{U}(t + h)$  and  $\boldsymbol{\Omega}(t + h)$  on the right-hand side are the values after streaming, Eq. (S-18) and (S-19).

#### S-IV. STERIC INTERACTIONS

Excluded-volume interactions between spheroids are taken into account by the approach provided in Ref. [19], see also [16].

The spheroid's surface in the laboratory frame is given by the quadratic form

$$1 = \mathcal{A}(\mathbf{x}) \equiv (\mathbf{x} - \mathbf{C})^T \mathbf{A}(\mathbf{x} - \mathbf{C}), \quad (\text{S-23})$$

where the orientation matrix  $\mathbf{A}$  can be expressed as

$$\mathbf{A} = (\mathbf{1} - \mathbf{e}\mathbf{e}^T)/b_x^2 + \mathbf{e}\mathbf{e}^T/b_z^2; \quad (\text{S-24})$$

$\mathbf{1}$  is the unit matrix. For the steric interactions, we introduce a virtual safety distance  $d_v$ , which is small compared to  $b_x$  and  $b_z$ . When computing steric interactions, we replace  $b_x$  and  $b_z$  by  $b_x + d_v$  and  $b_z + d_v$ , respectively. For all simulations, the value  $d_v = 0.7a$  is used.

The potential

$$U = 4\epsilon_0 \left[ \left( \frac{\sigma_0}{d_R + \sigma_0} \right)^{12} - \left( \frac{\sigma_0}{d_R + \sigma_0} \right)^6 \right] \quad (\text{S-25})$$

between spheroids is introduced to prevent their overlap. Here,  $\sigma_0$  and  $\epsilon_0$  correspond to a length and energy scale, respectively, which are set to  $\epsilon_0 = k_B T$  and  $\sigma_0 = 2d_v$ . The directional contact distance  $d_R$  between two spheroids, with orientation matrices  $\mathbf{A}_1$ ,  $\mathbf{A}_2$  and center positions  $\mathbf{C}_1$ ,  $\mathbf{C}_2$ , is an approximation to their true distance of closest approach and is defined by

$$d_R = R(1 - F(\mathbf{A}_1, \mathbf{A}_2)^{-1/2}) \quad (\text{S-26})$$

Here,  $\mathbf{R} = \mathbf{C}_2 - \mathbf{C}_1$ ,  $R = |\mathbf{R}|$ , and  $F(\mathbf{A}_1, \mathbf{A}_2)$  is the elliptic contact function, defined as [19]

$$\begin{aligned} F(\mathbf{A}_1, \mathbf{A}_2) &= \max_{\lambda} \min_{\mathbf{x}} \mathcal{S}(\mathbf{x}, \lambda) \\ &= \max_{\lambda} \min_{\mathbf{x}} (\lambda \mathcal{A}_1(\mathbf{x}) + (1 - \lambda) \mathcal{A}_2(\mathbf{x})). \end{aligned} \quad (\text{S-27})$$

Minimization with respect to  $\mathbf{x}$  demands  $\nabla \mathcal{S}(\mathbf{x}, \lambda) = 0$ , and hence,

$$\mathbf{x}(\lambda) = \{\lambda \mathbf{A}_1 + (1 - \lambda) \mathbf{A}_2\}^{-1} \{\lambda \mathbf{A}_1 \mathbf{C}_1 + (1 - \lambda) \mathbf{A}_2 \mathbf{C}_2\}. \quad (\text{S-28})$$

The value  $\lambda = \lambda_c$  that maximizes  $\mathcal{S}(\mathbf{x}(\lambda), \lambda)$  can be found by the root finding problem

$$\mathcal{A}_1(\mathbf{x}(\lambda)) - \mathcal{A}_2(\mathbf{x}(\lambda)) = 0. \quad (\text{S-29})$$

The forces and torques arising from the potential (S-25) can be calculated analytically and are given by [19]

$$\begin{aligned} \mathbf{F}_1 &= \frac{24\epsilon_0}{\sigma_0} \left[ 2 \left( \frac{\sigma_0}{d_R + \sigma_0} \right)^{13} - \left( \frac{\sigma_0}{d_R + \sigma_0} \right)^7 \right] \\ &\quad \times \left( \frac{\mathbf{R}}{R} (F^{-1/2} - 1) - \frac{R}{2} F^{-3/2} \mathbf{X}_c \right), \end{aligned} \quad (\text{S-30})$$

and

$$\mathbf{T}_1 = - \frac{12R\epsilon_0}{\sigma_0} \left[ 2 \left( \frac{\sigma_0}{d_R + \sigma_0} \right)^{13} - \left( \frac{\sigma_0}{d_R + \sigma_0} \right)^7 \right] \quad (\text{S-31})$$

$$\times F^{-3/2} (\mathbf{x}_c - \mathbf{C}) \times \mathbf{X}_c \quad (\text{S-32})$$

for the first spheroid, where  $\mathbf{X}_c = 2\lambda_c \mathbf{A}_1 (\mathbf{x}_c - \mathbf{C}_1)$ . The force and torque on the second spheroid follow by Newton's action-reaction law, i.e.,

$$\mathbf{F}_2 = -\mathbf{F}_1, \quad (\text{S-33})$$

$$\mathbf{T}_2 = -\mathbf{T}_1 + \mathbf{R} \times \mathbf{F}_1. \quad (\text{S-34})$$

We restrict ourselves to short-rang repulsive interactions by setting the potential  $U$  to a constant value for  $d_R > (\sqrt[6]{2}-1)\sigma_0$ , which implies that  $\mathbf{F}_1$  and  $\mathbf{T}_1$  are zero for this range of  $d_R$  values. Note that an upper bound to  $d_R$  is  $R - 2b_z$ , which means that two spheroids will not interact if  $R > 2b_z + (\sqrt[6]{2}-1)\sigma_0$ . This inequality is checked before a numerical calculation of  $d_R$  is employed.

### S-V. DECAY TIME OF THE BOND-VECTOR AUTOCORRELATION FUNCTION

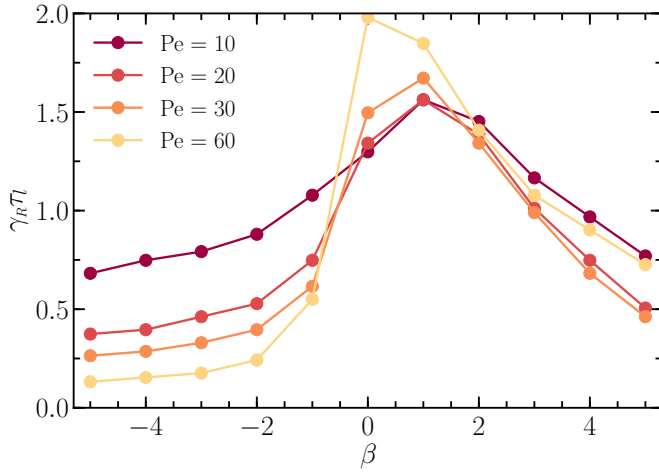

FIG. S1. Characteristic decay time  $\tau_l$  of the bond-vector orientational autocorrelation function of Fig. 7 as a function of the active stress  $\beta$  for the Péclet numbers  $Pe = 10, 20, 30,$  and  $60$ . The decay time is scaled by the rotational diffusion coefficient of a passive colloid, where  $\gamma_R = 2D_R^0$ .

### S-VI. CORRELATION FUNCTION OF PROPULSION DIRECTION AND BOND VECTOR

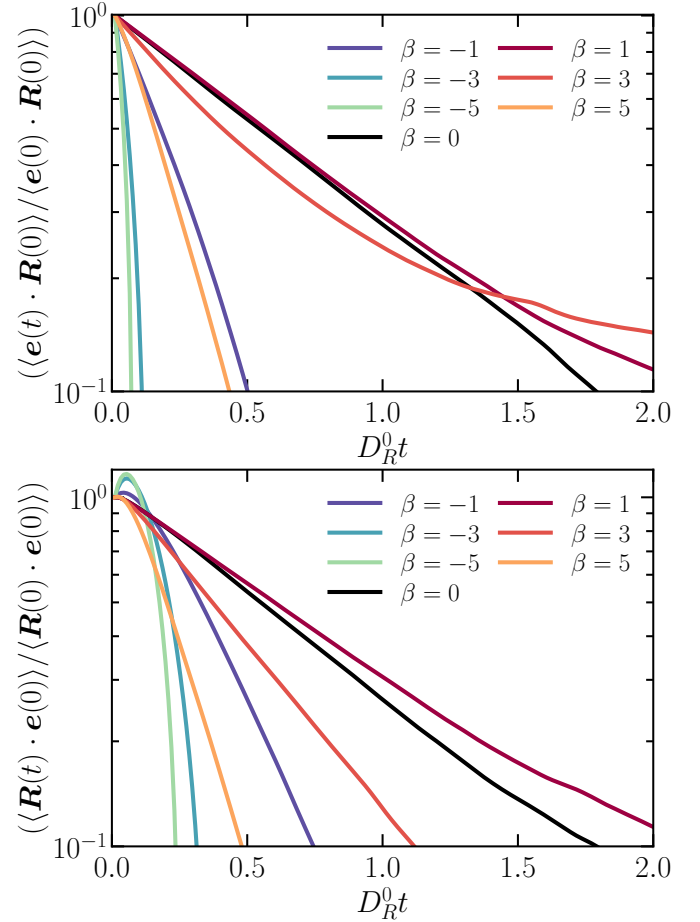

FIG. S2. (Top) Correlation function of the squirmers propulsion direction,  $\mathbf{e}(t)$  and the bond vector  $\mathbf{R}$ . (Bottom) Correlation function the bond vector and the squirmers propulsion direction. The Péclet number is  $Pe = 30$ . The two correlations show qualitative and quantitative differences reflecting the complexity of the strong hydrodynamic coupling between the two squirmers of the dumbbell.

### S-VII. SQUIRMER-SQUIRMER PROPULSION ALIGNMENT

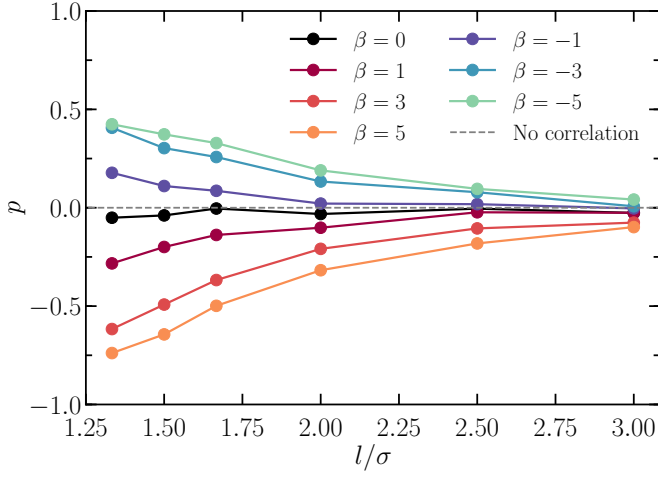

FIG. S3. Average alignment  $p = \langle \mathbf{e}_1 \cdot \mathbf{e}_2 \rangle$  of the squirmer propulsion directions as a function of the dumbbell bond length for the active stress  $\beta = 0, \pm 1, \pm 3$ , and  $\pm 5$ . The Péclet number is  $Pe = 10$ .

### S-VIII. BOND FORCE

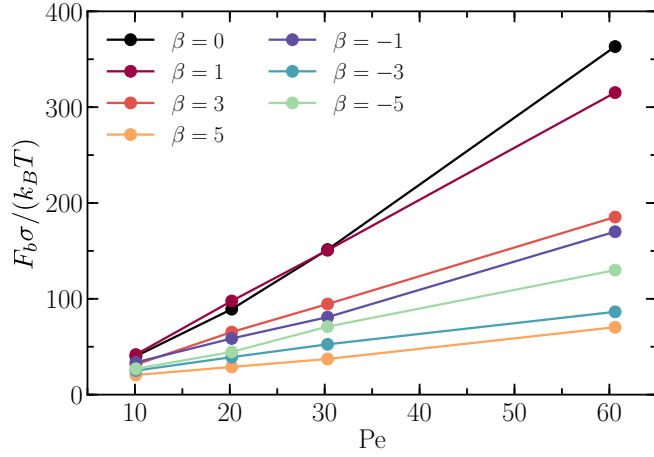

FIG. S4. Bond force (Eq. (13)) as a function of Péclet number for the indicated active stresses.

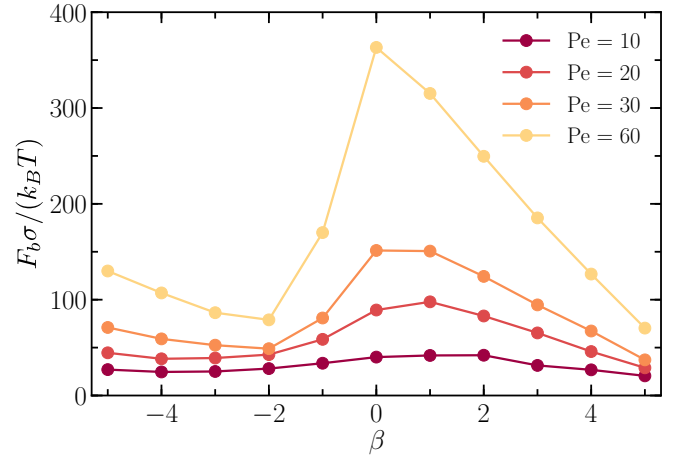

FIG. S5. Bond force (Eq. (13)) as a function of  $\beta$  for the indicated Péclet numbers.

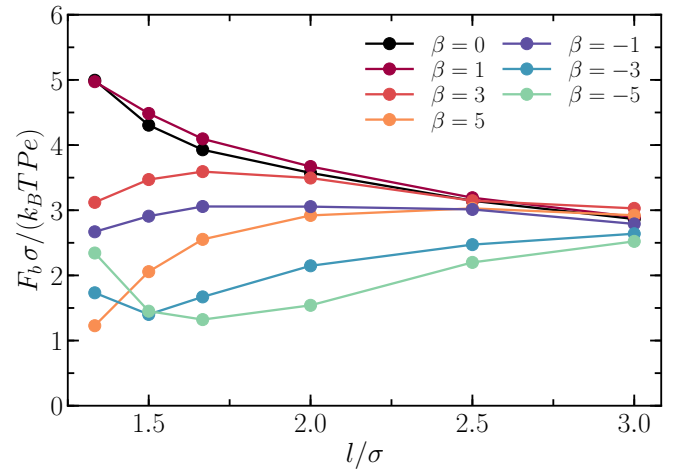

FIG. S6. Bond force (Eq. (13)) as a function of the dumbbell bond length for the indicated active stress and  $Pe = 30$ .

## S-IX. MEAN-SQUARE DISPLACEMENT

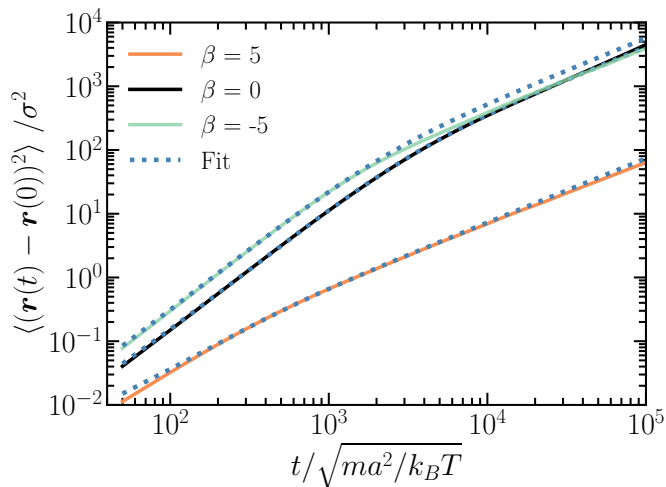

FIG. S7. Center-of-mass mean-square displacement of squirmer dumbbells as a function of the scaled time  $D_R^0 t$  for the indicated active stresses and the Péclet number  $Pe = 30$ . The dotted lines are fits with the MSD of active Brownian dumbbells, Eq. (14).

## S-X. MOVIES

- **Movie M1:** M1\_Beta-5CM.mpeg  
Squirmer dumbbell in the center-of-mass reference frame:  $Pe = 30$  and  $\beta = -5$  (pusher).
- **Movie M2:** M2\_Beta-5lab.mpeg  
Squirmer dumbbell in the laboratory reference frame:  $Pe = 30$  and  $\beta = -5$  (pusher).
- **Movie M3:** M3\_Beta5CM.mpeg  
Squirmer dumbbell in the center-of-mass reference frame:  $Pe = 30$  and  $\beta = 5$  (puller).
- **Movie M4:** M4\_Beta5lab.mpeg  
Squirmer dumbbell in the laboratory reference frame:  $Pe = 30$  and  $\beta = 5$  (puller).

- 
- [1] A. Malevanets and R. Kapral, Mesoscopic model for solvent dynamics, *J. Chem. Phys.* **110**, 8605 (1999).
- [2] R. Kapral, Multiparticle collision dynamics: Simulations of complex systems on mesoscale, *Adv. Chem. Phys.* **140**, 89 (2008).
- [3] G. Gompper, T. Ihle, D. M. Kroll, and R. G. Winkler, Multi-particle collision dynamics: A particle-based mesoscale simulation approach to the hydrodynamics of complex fluids, *Adv. Polym. Sci.* **221**, 1 (2009).
- [4] R. G. Winkler, Flow simulations with multiparticle collision dynamics, in *Hierarchical Methods for Dynamics in Complex Molecular Systems*, IAS Series, Vol. 10, edited by J. Grotendorst, G. Sutmann, G. Gompper, and D. Marx (Forschungszentrum Jülich GmbH, Jülich, 2012).
- [5] H. Noguchi and G. Gompper, Transport coefficients of off-lattice mesoscale-hydrodynamics simulation techniques, *Phys. Rev. E* **78**, 016706 (2008).
- [6] M. Theers and R. G. Winkler, Bulk viscosity of multiparticle collision dynamics fluids, *Phys. Rev. E* **91**, 033309 (2015).
- [7] M. Yang, M. Theers, J. Hu, G. Gompper, R. G. Winkler, and M. Ripoll, Effect of angular momentum conservation on hydrodynamic simulations of colloids, *Phys. Rev. E* **92**, 013301 (2015).
- [8] A. Lamura, G. Gompper, T. Ihle, and D. M. Kroll, Multiparticle collision dynamics: Flow around a circular and a square cylinder, *Europhys. Lett.* **56**, 319 (2001).
- [9] T. Ihle and D. M. Kroll, Stochastic rotation dynamics: A Galilean-invariant mesoscopic model for fluid flow, *Phys. Rev. E* **63**, 020201(R) (2001).
- [10] R. G. Winkler and C.-C. Huang, Stress tensors of multiparticle collision dynamics fluids, *J. Chem. Phys.* **130**, 074907 (2009).
- [11] C.-C. Huang, A. Chatterji, G. Sutmann, G. Gompper, and R. G. Winkler, Cell-level canonical sampling by velocity scaling for multiparticle collision dynamics simulations, *J. Comput. Phys.* **229**, 168 (2010).
- [12] C.-C. Huang, A. Varghese, G. Gompper, and R. G. Winkler, Thermostat for nonequilibrium multiparticle-collision-dynamics simulations, *Phys. Rev. E* **91**, 013310 (2015).
- [13] I. P. Omelyan, Algorithm for numerical integration of the rigid-body equations of motion, *Phys. Rev. E* **58**, 1169 (1998).
- [14] M. Theers, E. Westphal, G. Gompper, and R. G. Winkler, From local to hydrodynamic friction in Brownian motion: A multiparticle collision dynamics simulation study, *Phys. Rev. E* **93**, 032604 (2016).
- [15] J. T. Padding, A. Wysocki, H. Löwen, and A. A. Louis, Stick boundary conditions and rotational velocity auto-correlation functions for colloidal particles in a coarse-grained representation of the solvent, *J. Phys.: Condens. Matter* **17**, S3393 (2005).
- [16] M. Theers, E. Westphal, G. Gompper, and R. G. Winkler, Modeling a spheroidal microswimmer and cooperative swimming in a narrow slit, *Soft Matter* **12**, 7372 (2016).
- [17] M. T. Downton and H. Stark, Simulation of a model microswimmer, *J. Phys.: Condens. Matter* **21**, 204101 (2009).
- [18] S. R. Keller and T. Y. Wu, A porous prolate-spheroidal model for ciliated micro-organisms, *J. Fluid Mech.* **80**, 259 (1977).
- [19] L. Paramonov and S. N. Yaliraki, The directional contact distance of two ellipsoids: Coarse-grained potentials for anisotropic interactions, *J. Chem. Phys.* **123**, 194111 (2005).
